# Supplementary material
Source: Royal Society of Chemistry journal article supplement (doi:10.1039/d6cp00514d)
Supplement: d6cp00514d1.pdf [file d6cp00514d1.pdf]

## Supplementary data

### **Solvent-Dependent Mn Doping: Profound Effects on Microstructure and Enhanced Photothermal/Photodynamic Performance in $W_{18}O_{49}$ Diversified System**

*Xuejiao Li<sup>a, b, 1, \*</sup>, Yuxiao Wang<sup>a, 1</sup>, Haiyang Fu<sup>a</sup>, Jiamin Cheng<sup>a</sup>, Bo Li<sup>a</sup>, Zilong Xu<sup>a</sup>, Na Fan<sup>a</sup>, Rui Li<sup>a</sup>, Lianwei Shan<sup>a</sup>, Xin Liu<sup>a</sup>, Limin Dong<sup>a</sup>, Hongrui Ji<sup>a, \*</sup>, Piaoping Yang<sup>b, \*</sup>*

<sup>a</sup> Heilongjiang Provincial Key Laboratory of CO<sub>2</sub> Resource Utilization and Energy Catalytic Materials, School of Materials Science and Chemical Engineering, Harbin University of Science and Technology, Harbin, 150040, P R China

<sup>b</sup> Key Laboratory of Superlight Materials and Surface Technology, College of Material Sciences and Chemical Engineering, Harbin Engineering University, Harbin 150001, P R China

<sup>1</sup> These authors contributed equally to this work.

\* Corresponding authors. E-mail: [lixuejiao@hrbust.edu.cn](mailto:lixuejiao@hrbust.edu.cn), [jihongrui@hrbust.edu.cn](mailto:jihongrui@hrbust.edu.cn)

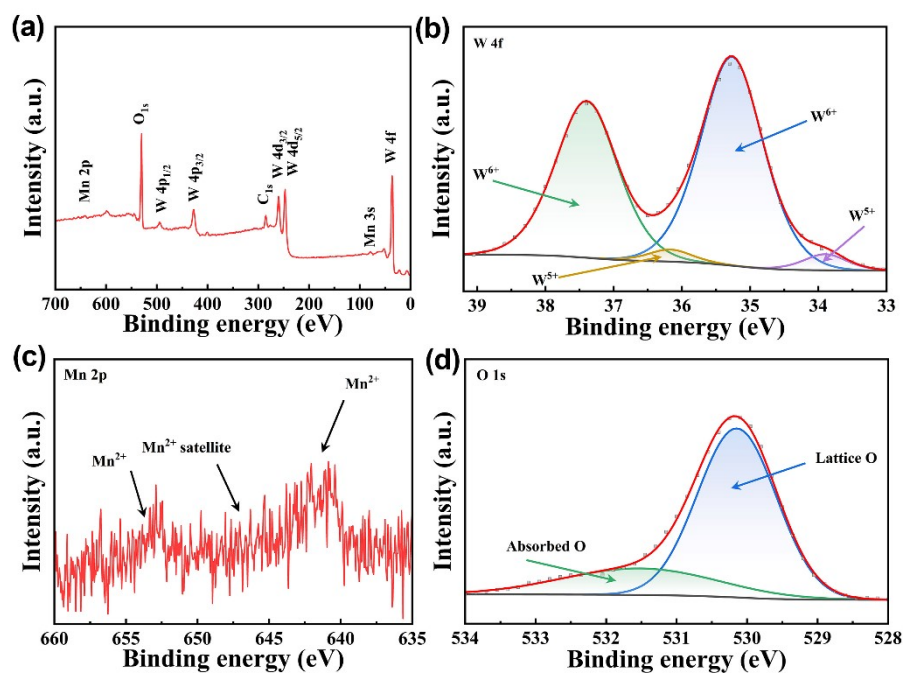

Figure. S1 The Survey and high resolution XPS spectra of 5%Mn-W<sub>18</sub>O<sub>49</sub> prepared with isopropanol (a) Survey, (b) W 4f, (c) Mn 2p and (d) O 1s.

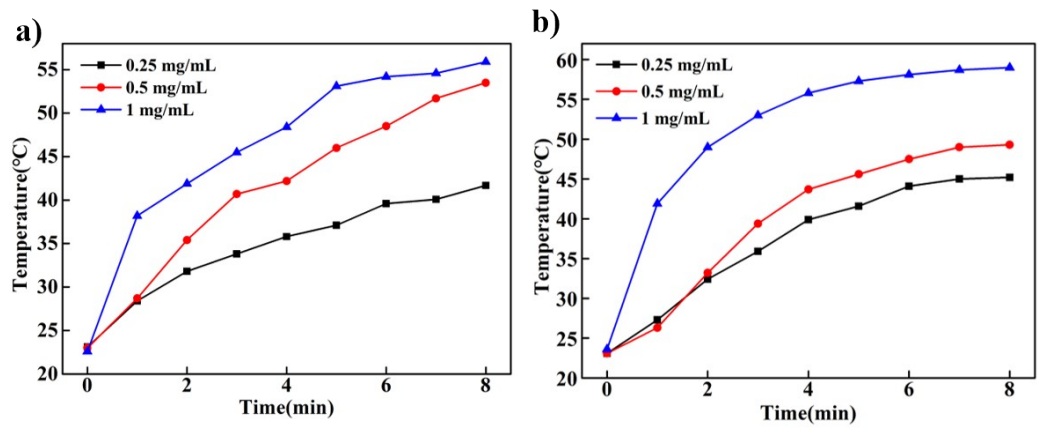

Figure. S2 Photothermal heating curve of  $W_{18}O_{49}$  samples at different concentrations under different wavelength (a) with water as control, (b) 808 nm, and (c) 1064 nm

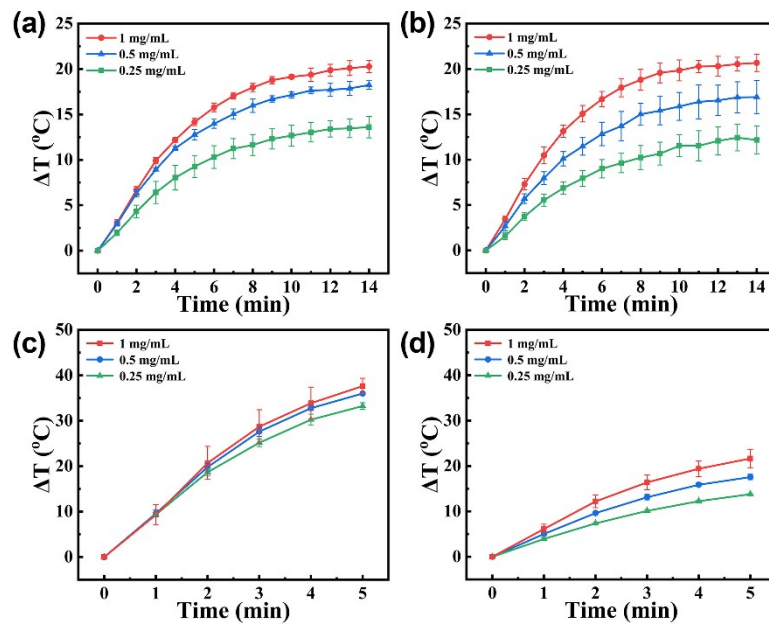

Figure. S3 Photothermal heating curve of  $x\text{Mn-W}_{18}\text{O}_{49}$  samples prepared with n-propanol (above) and isopropanol (below) at different concentration under different wavelength (a)(b) 808 nm, (c)(d) 1064 nm.

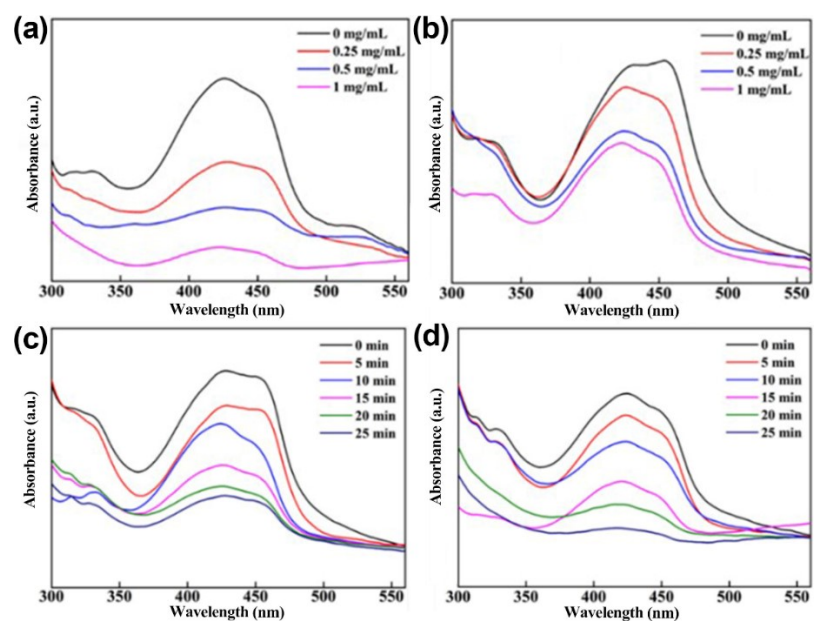

Figure. S4 Absorption spectra of DPBF for  $W_{18}O_{49}$  samples under different illumination time, concentration and wavelengths (a)(b) 808 nm, (c)(d) 1064 nm

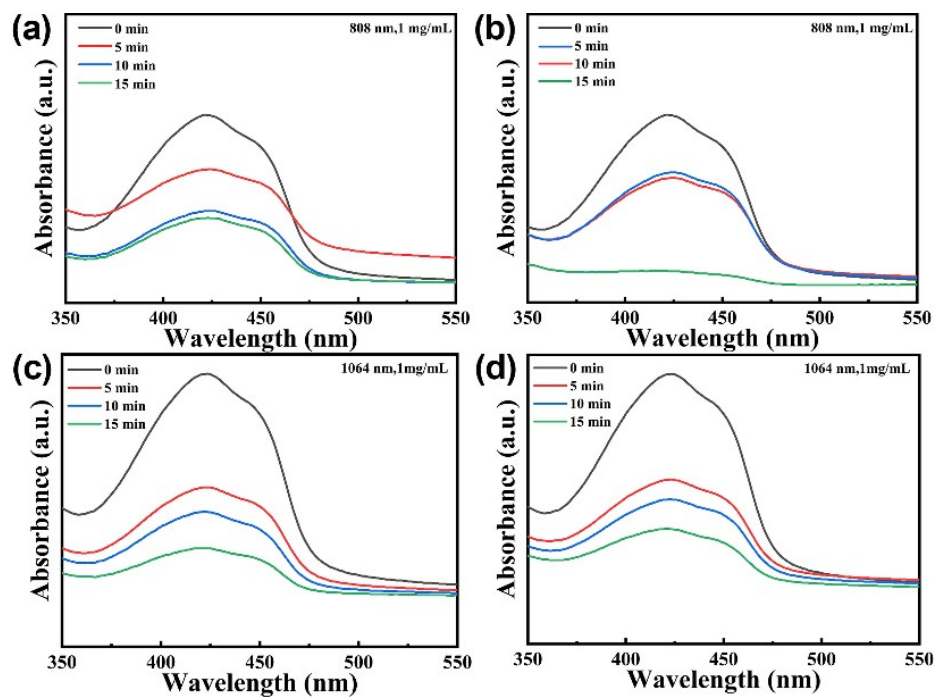

Figure. S5 Absorption spectra of DPBF by different illumination time of  $x\text{Mn-W}_{18}\text{O}_{49}$  samples prepared with n-propanol (above) and isopropanol (below) (a)(b) 808 nm, (c)(d) 1064 nm.

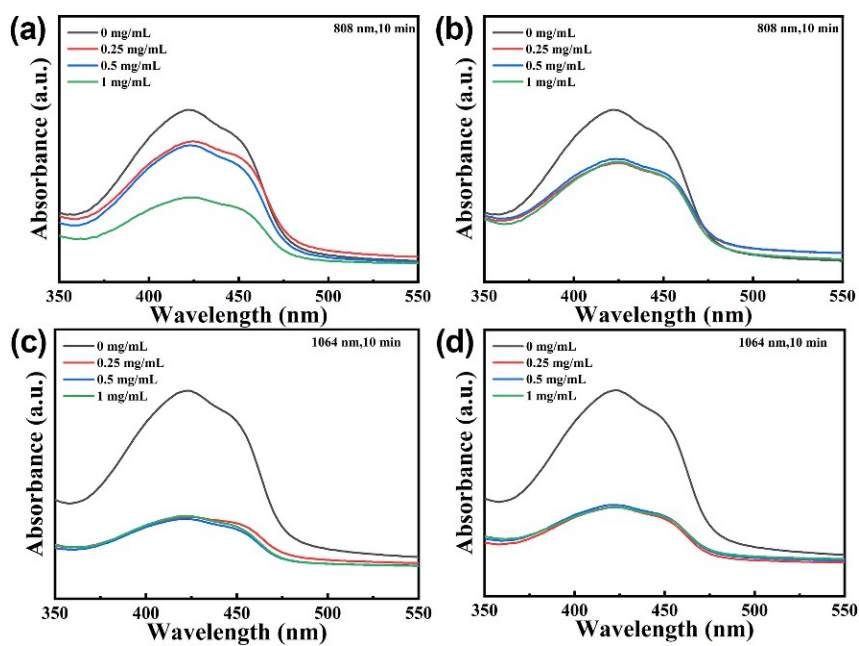

Figure. S6 Absorption spectra of DPBF by different concentrations of  $x\text{Mn-W}_{18}\text{O}_{49}$  samples prepared with n-propanol (above) and isopropanol (below) (a)(b) 808 nm, (c)(d) 1064 nm.
